# Supplementary material for: The USDA cucumber (Cucumis sativus L.) collection: genetic diversity, population structure, genome-wide association studies, and core collection development
Source: PubMed Central journal article supplement (PMC6165849; doi:10.1038/s41438-018-0080-8), 2018-10-01
Supplement: 41438_2018_80_MOESM2_ESM.pdf [file 41438_2018_80_MOESM2_ESM.pdf]

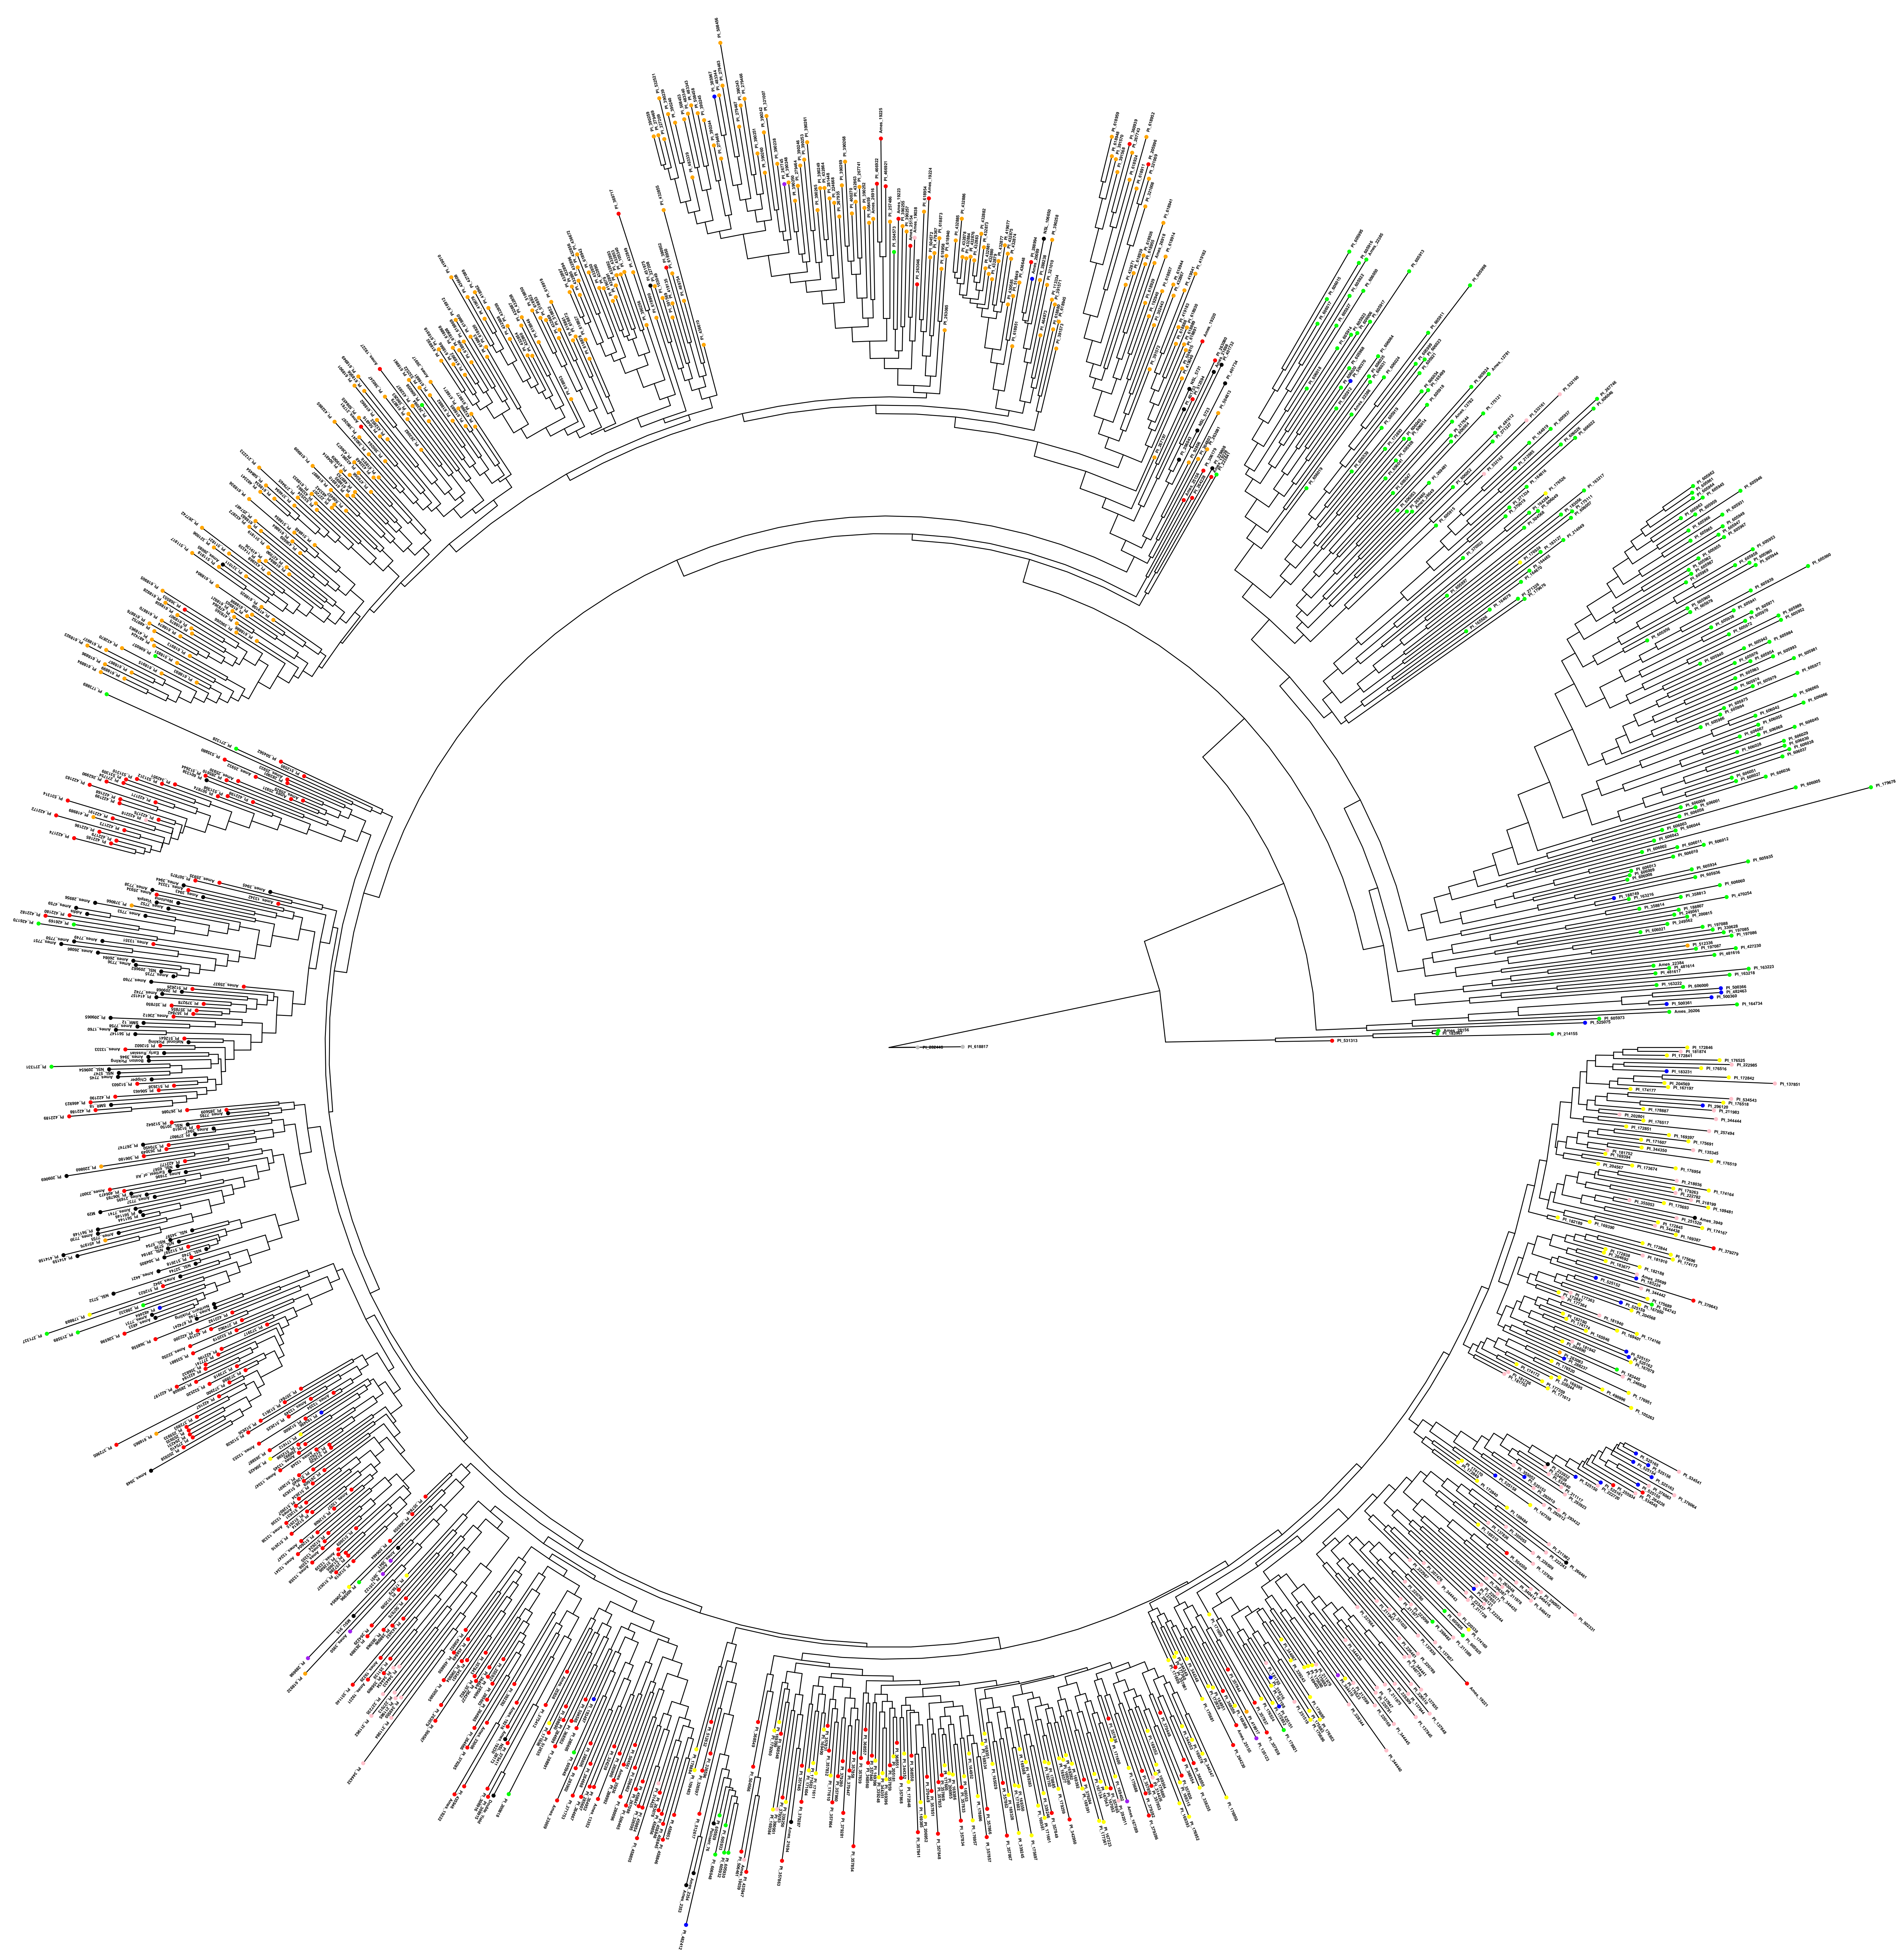

- Africa
- Central West Asia
- East Asia
- Europe
- North America
- Others
- South Asia
- Turkey
- Outgroup
